# Supplementary material for: Inter-comparison of snow depth over Arctic sea ice from reanalysis reconstructions and satellite retrieval
Source: Copernicus journal article supplement (doi:10.5194/tc-15-345-2021), 2021-01-27
Supplement: Supplementary file 1 [file tc-15-345-2021-supplement.pdf]

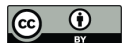

## *Supplement of*

# **Inter-comparison of snow depth over Arctic sea ice from reanalysis reconstructions and satellite retrieval**

**Lu Zhou et al.**

*Correspondence to:* Julienne Stroeve ([stroeve@nsidc.org](mailto:stroeve@nsidc.org))

The copyright of individual parts of the supplement might differ from the CC BY 4.0 License.

Table S1 Information of CRREL and AWI buoys used in validation of snow products

| Buoy  | Buoy number/date                                                                                                                                                                                                                                                                                                                                                                                                       |
|-------|------------------------------------------------------------------------------------------------------------------------------------------------------------------------------------------------------------------------------------------------------------------------------------------------------------------------------------------------------------------------------------------------------------------------|
| CRREL | 2002A, 2003A, 2003C, 2003D, 2004A, 2004B, 2004C, 2004D, 2005F, 2006C, 2006D, 2006E, 2007B, 2007C, 2007D, 2008B, 2008C, 2008 E, 2009A, 2010A, 2010B, 2010C, 2010F, 2010G, 2010H, 2011B, 2011C, 2011E, 2011J, 2011K, 2011L, 2012A, 2012 B, 2012G, 2012H, 2012I, 2012J, 2012L, 2012M, 2013A, 2013B, 2013D, 2013F, 2013G, 2013H, 2013I, 2014B, 2014C, 2014D, 2014F, 2014I, 2015A, 2015B, 2015C, 2015D, 2015F, 2015G, 2015J |
| AWI   | 2013S3, 2013S4, 2014S13, 2014S14, 2014S15, 2014S25, 2015S16, 2015S20, 2015S21, 2015S22, 2015S23, 2015S26, 2015S27, 2015S28, 2015S29, 2015S30, 2015S32, 2015S33, 2015S35, 2016S36, 2016S44, 2016S45, 2016S46, 2016S50, 2017S43, 2017S51, 2017S52, 2017S53                                                                                                                                                               |

Table S2: Correlation of means snow depth in April among reanalysis-based products

| Correlation  | SnowModel-LG | NESOISM | UW   | CPOM |
|--------------|--------------|---------|------|------|
| SnowModel-LG | -            | 0.83    | 0.53 | 0.40 |
| NESOSIM      | -            | -       | 0.78 | 0.69 |
| UW           | -            | -       | -    | 0.73 |
| CPOM         | -            | -       | -    | -    |

Table S3: R<sup>2</sup>(in bold), RMSE (left in bracket, units: cm) and normalized RMSE (right in bracket) in comparison with four OIB products using the snow product's native spatio-temporal resolution

| OIB Product | SnowModel-LG               | NESOSIM                   | CPOM                      | UW                        | DuST                      | DESS                       | PMW Bremen                | PMW DMI                   |
|-------------|----------------------------|---------------------------|---------------------------|---------------------------|---------------------------|----------------------------|---------------------------|---------------------------|
| Quicklook   | <b>0.19</b><br>(11.2,0.23) | <b>0.28</b><br>(9.6,0.23) | <b>0.42</b><br>(7.3,0.15) | <b>0.03</b><br>(3.3,0.15) | <b>0.25</b><br>(5.5,0.14) | <b>0.34</b><br>(15.1,0.41) | <b>0.51</b><br>(5.1,0.11) | <b>0.53</b><br>(4.3,0.10) |
| GSFC        | <b>0.21</b><br>(11.2,0.23) | <b>0.41</b><br>(8.6,0.22) | <b>0.30</b><br>(8.6,0.19) | <b>0.22</b><br>(3.5,0.14) | <b>0.21</b><br>(6.2,0.14) | <b>0.41</b><br>(14.8,0.34) | <b>0.54</b><br>(5.1,0.12) | <b>0.38</b><br>(5.3,0.13) |
| JPL         | <b>0.33</b><br>(10.4,0.15) | <b>0.41</b><br>(8.6,0.15) | <b>0.55</b><br>(7.0,0.13) | <b>0.29</b><br>(3.4,0.10) | <b>0.26</b><br>(6.1,0.13) | <b>0.46</b><br>(14.2,0.35) | <b>0.61</b><br>(4.8,0.10) | <b>0.52</b><br>(4.7,0.08) |
| SRLD        | <b>0.35</b><br>(10.4,0.10) | <b>0.42</b><br>(8.6,0.10) | <b>0.52</b><br>(7.1,0.10) | <b>0.19</b><br>(3.6,0.06) | <b>0.15</b><br>(6.5,0.11) | <b>0.50</b><br>(13.7,0.23) | <b>0.56</b><br>(5.1,0.08) | <b>0.37</b><br>(5.3,0.06) |

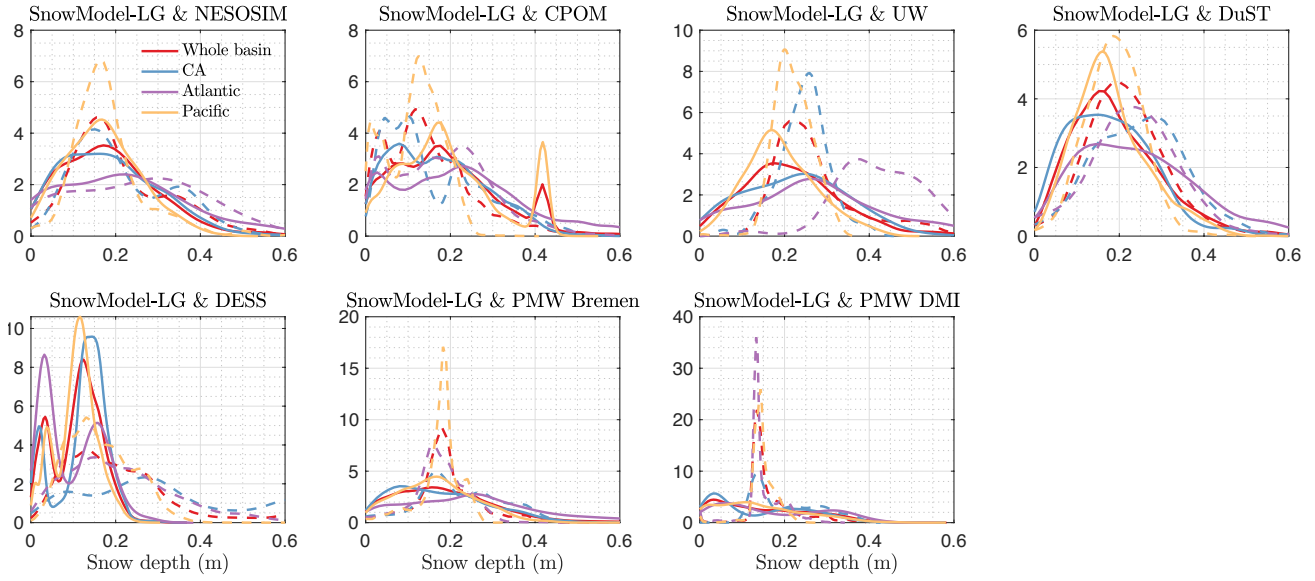

Figure S1: Comparison in distribution of snow depth in spring (March-April) 2015 (units: m) over different regions. Solid lines are from MERRA2-based SnowModel-LG while dashed lines are from corresponding product. The analysis is made based on the common spatial coverage of the different products and SnowModel-LG.

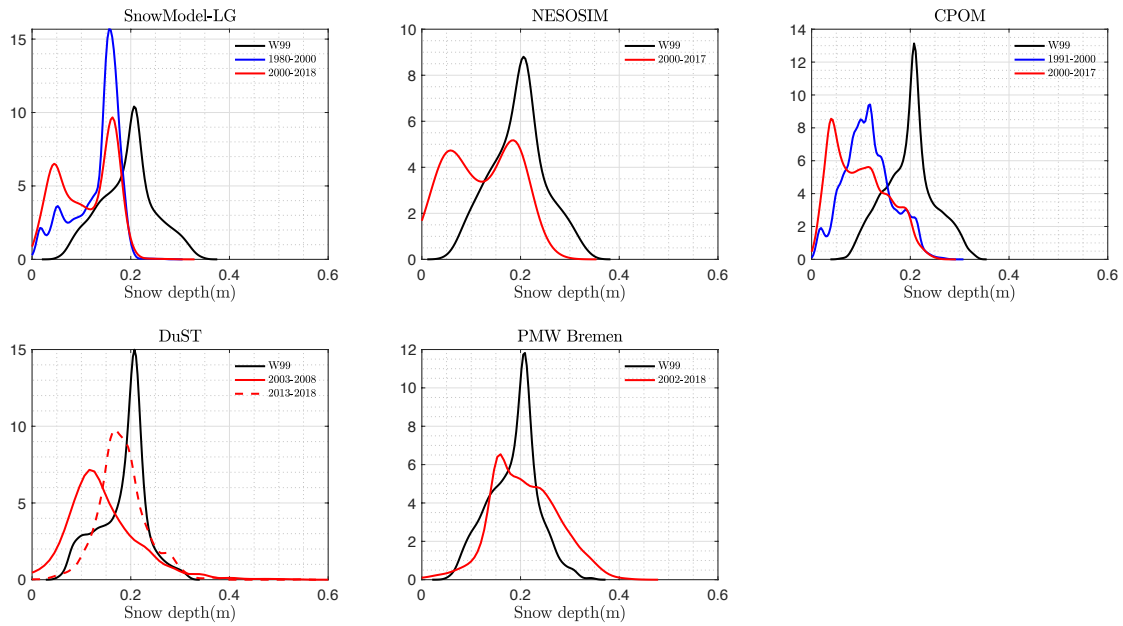

Figure S2: Snow distribution comparison between W99 and snow products in autumn (October/November).

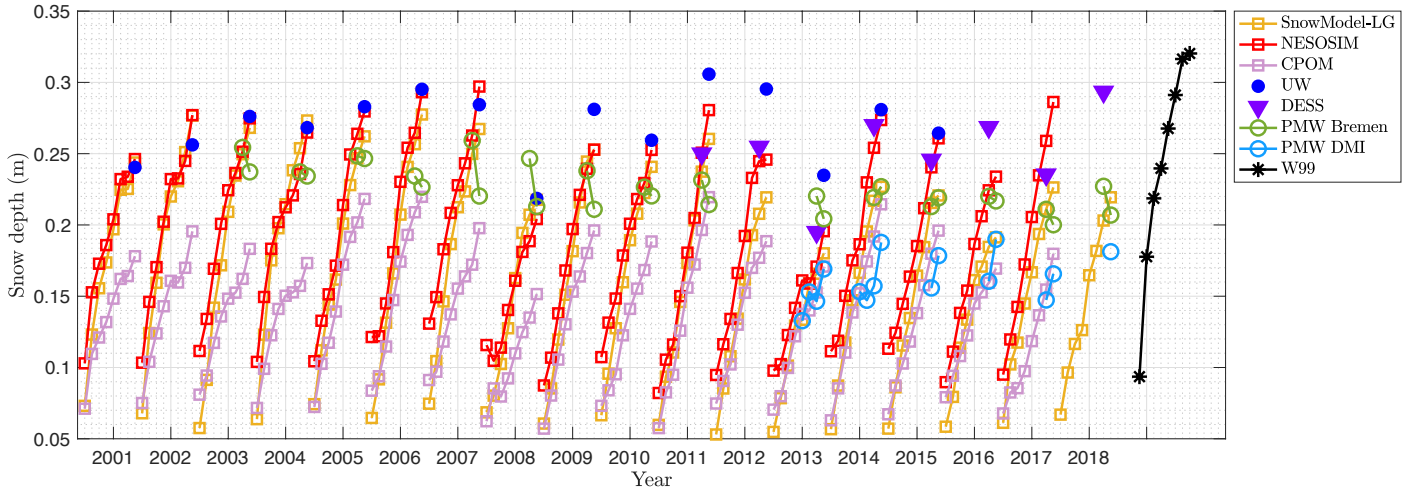

Figure S3: Same with Figure 7 but for common coverage up to 87.5°N (without DuST)

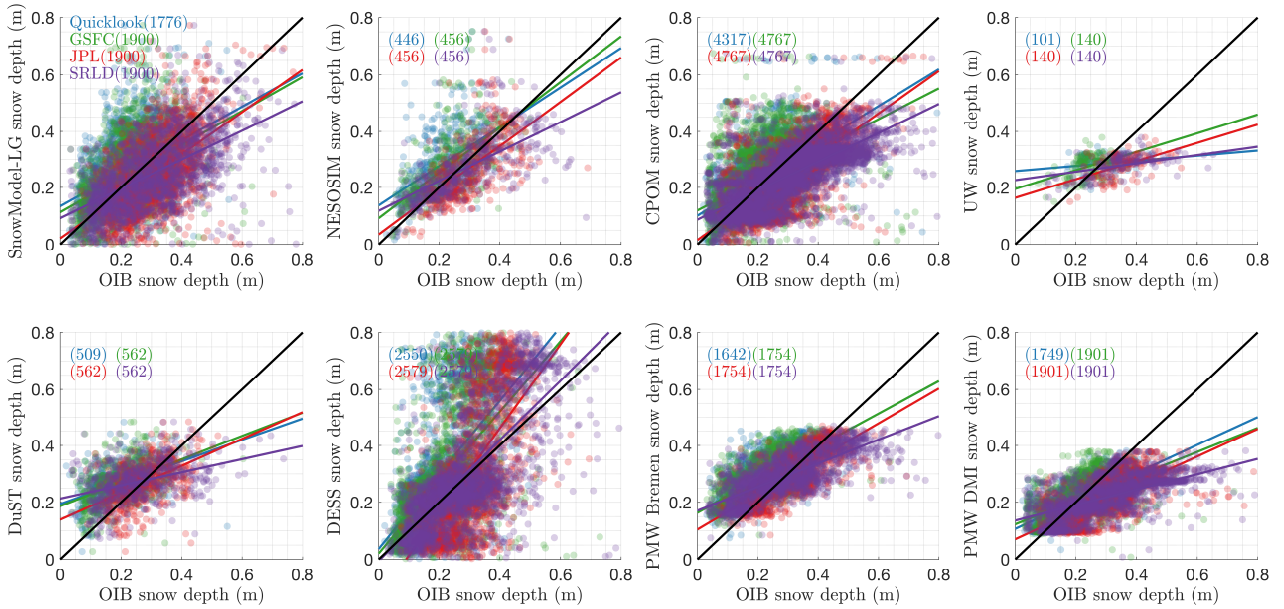

Figure S4: Same as Figure 12, but comparisons with four OIB products using the native spatio-temporal resolution of the snow products

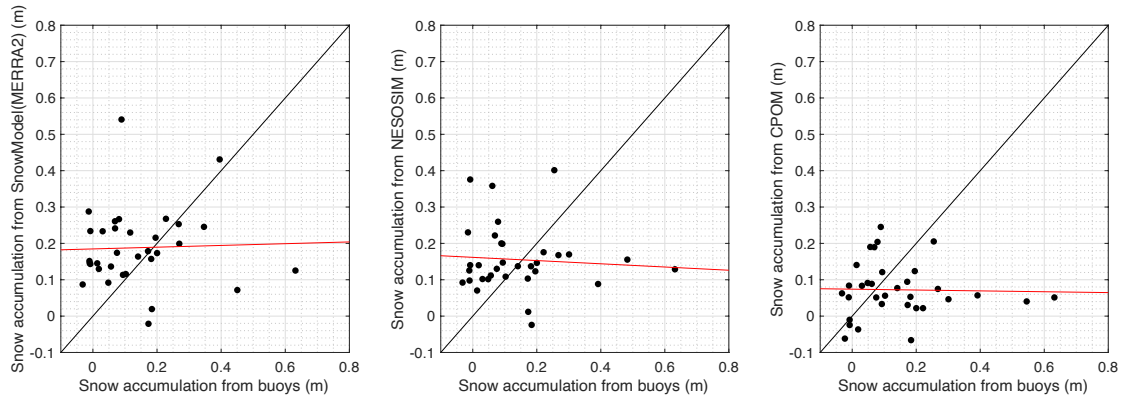

Figure S5: Comparison of total winter snow accumulation (starts from early winter to the next year) between buoys and three snow products based on daily snow products.
